# Supplementary material
Source: Springer Nature journal article supplement (https://www.springermedizin.de/resource/supplementary/12937_2010_357_MOESM3_ESM.pdf/25653206)

**Living Standard Mean**

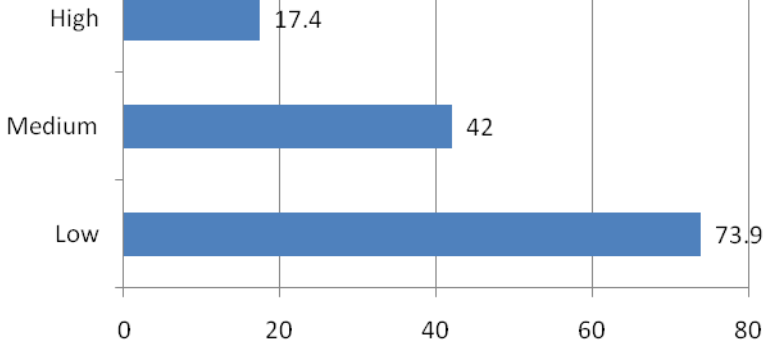

**Percent of population having a dietary diversity score < 4**

Supplement: MOESM3 [file 25653206]
